# Supplementary material for: siRNA delivery targeting to the lung via agglutination-induced accumulation and clearance of cationic tetraamino fullerene
Source: PubMed Central journal article supplement (PMC4017229; doi:10.1038/srep04916), 2014-05-12
Supplement: srep04916-s1.pdf [file srep04916-s1.pdf]

## Supplementary Information

### siRNA delivery targeting to the lung *via* agglutination-induced accumulation and clearance of cationic tetraamino fullerene

Kosuke Minami,\* Koji Okamoto,<sup>§</sup> Kent Doi,<sup>§</sup> Koji Harano,\* Eisei Noiri,<sup>§</sup> Eiichi Nakamura\*

\* *Department of Chemistry, The University of Tokyo, 7-3-1 Hongo, Bunkyo-ku, Tokyo 113-0033, Japan*

<sup>§</sup> *Department of Hemodialysis and Apheresis, University Hospital, The University of Tokyo, 7-3-1 Hongo, Bunkyo-ku, Tokyo 113-8655, Japan*

### Supplementary Figure

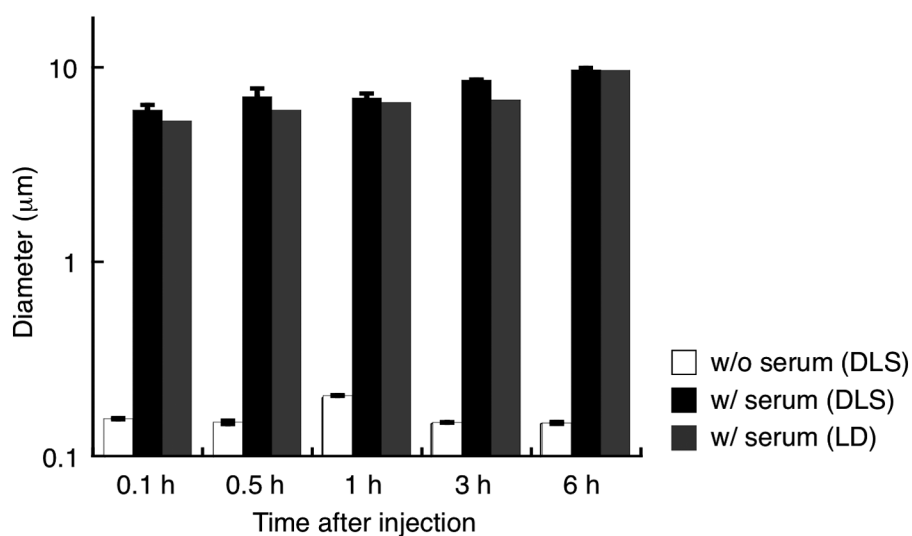

**Fig. S1.** Agglutination of TPFE-siRNA complex in the serum. Size of TPFE-siRNA complexes was determined by DLS (black and white bars,  $N = 3$ ) and LD (gray bars). Black and gray bars indicate TPFE-siRNA complexes mixed with serum, and white bars indicate the TPFE-siRNA complexes without serum. Error bars indicate  $\pm$ SD.
